# Supplementary material
Source: PubMed Central journal article supplement (PMC5714445)
Supplement: 1255FigureS1.pdf [file 1255FigureS1.pdf]

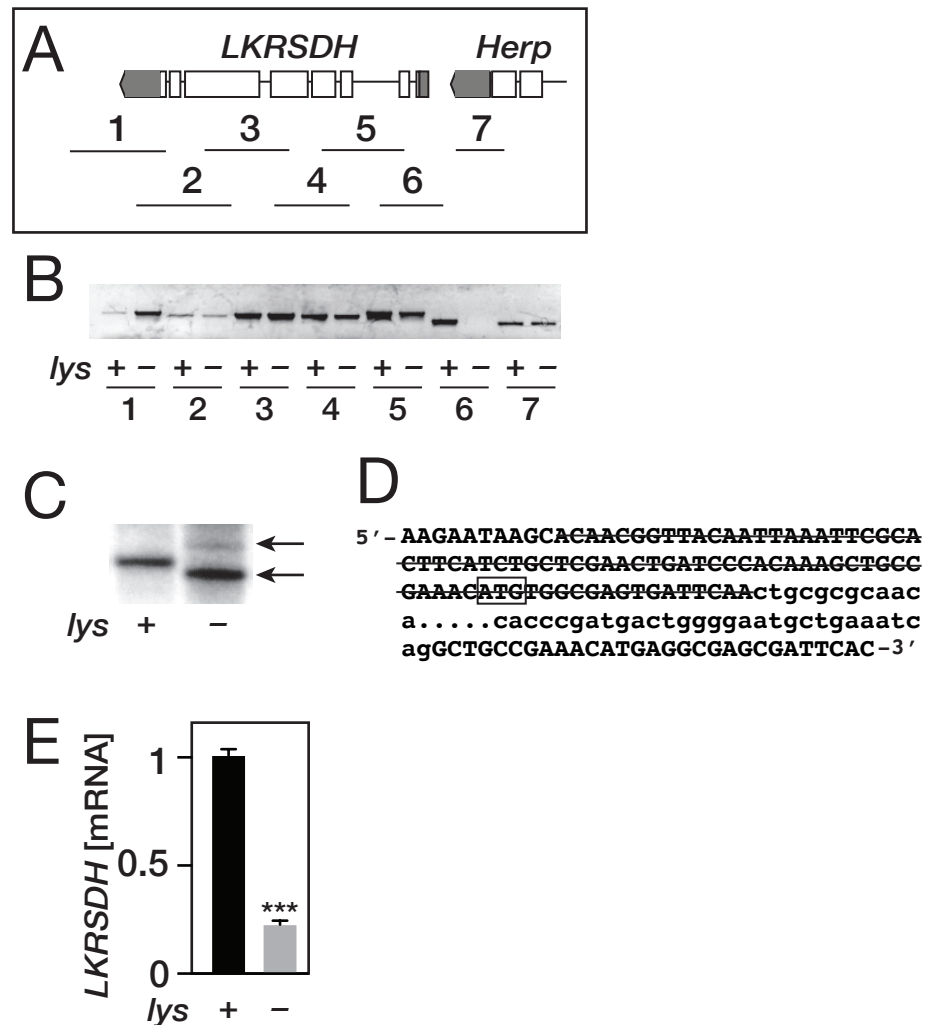

**Supplemental Figure 1. Molecular characterization of the *lys*<sup>1</sup> mutation.** (A) A schematic diagram illustrating the genomic region surrounding *LKRSDH* that was sequenced using a PCR based strategy. Horizontal lines represent the PCR products generated for this analysis. (B) The resulting PCR products from both *w*<sup>1118</sup> and *w*<sup>1118</sup>; *lys*<sup>1</sup> mutants were analyzed using gel electrophoresis. Numbers below each set of bands correspond to the genomic regions underlined in (A). Note that the genomic region containing exon 2 fails to amplify in *w*<sup>1118</sup>; *lys*<sup>1</sup> mutants. (C) Genomic DNA from *w*<sup>1118</sup> controls and *w*<sup>1118</sup>; *lys*<sup>1</sup> mutants were analyzed using a Southern blot to detect the second *LKRSDH* exon. (D) The DNA sequence of the *lys*<sup>1</sup> insertion. Lower case letters represent the insertion. '...' represents the large stretch of repetitive sequence present within the insertion. The deleted sequence is denoted with a line through the text. The start codon is boxed. (E) qRT-PCR analysis of *LKRSDH* in *w*<sup>1118</sup> controls and *w*<sup>1118</sup>; *lys*<sup>1</sup> mutants. \*\*\* p < 0.001.
